# Supplementary material
Source: publisher site journal article supplement (https://www.dovepress.com/article/315696)
Supplement: Supplementary file 1 [file get_supplementary_file.php]

**An Exploratory Study for the Association of Gut Microbiome with Efficacy of Immune Checkpoint Inhibitor in Patients with Hepatocellular Carcinoma**

Ying-Chun Shen, Pei-Chang Lee, Yu-Lun Kuo, Wei-Kai Wu, Chieh-Chang Chen, Chengh-Hau Lei, Ching-Ping Yeh, Chiun Hsu, Chih-Hung Hsu, Zhong-Zhe Lin, Yu-Yun Shao, Li-Chun Lu, Tsung-Hao Liu, Chien-Hung Chen, Ming-Shiang Wu, Yi-Hsiang Huang, Ann-Lii Cheng

**Table of content**

**Table S1 …………………………………………………….............................. 2**

**Table S2 ………………………………………………….…........................... 5**

**Figure S1 ……………………………………………………............................. 8**

**Figure S2 ……………………………………………………............................. 9**

**Figure S3 …………………………………………………….............................. 10**

**Figure S4 …………………………………………………….............................. 11**

**Figure S5 …………………………………………………….............................. 12**

**Figure S6 …………………………………………………….............................. 13**

**Table S1: Patient characteristics of each analysis cohort**

|  | **Baseline**  **16S rRNA sequencing**  **(N=36)** | **Paired**  **16S rRNA sequencing**  **(N=20)** | | **Baseline**  **shotgun sequencing**  **(N=18)** | |
| --- | --- | --- | --- | --- | --- |
|  |  |  | *P*-valuea |  | *P*-valuea |
| **Age (year-old)** |  |  | NS |  | NS |
| Average | 62.8 | 60.7 |  | 62.8 |  |
| Range | 23.1-86.8 | 23.1-75.9 |  | 23.1-73.0 |  |
| **Gender** |  |  | NS |  | NS |
| Male | 31 | 19 |  | 18 |  |
| Female | 5 | 1 |  | 0 |  |
| **Etiology** |  |  | NS |  | NS |
| None | 3 | 1 |  | 0 |  |
| HBV | 21 | 12 |  | 13 |  |
| HCV | 6 | 3 |  | 2 |  |
| Alcohol | 1 | 1 |  | 0 |  |
| HBV+HCV | 2 | 1 |  | 0 |  |
| HBV+ Alcohol | 2 | 2 |  | 2 |  |
| HCV + Alcohol | 1 | 0 |  | 1 |  |
| **Treatment** |  |  | NS |  | NS |
| Anti-PD-1/anti-PD-L1 | 27 | 13 |  | 11 |  |
| Anti-PD-1/anti-PD-L1 +  targeted | 9 | 7 |  | 7 |  |
| **PV invasion** |  |  | NS |  | NS |
| Yes | 19 | 9 |  | 9 |  |
| No | 17 | 11 |  | 9 |  |
| **Metastasis** |  |  | NS |  | NS |
| Yes | 18 | 9 |  | 10 |  |
| No | 18 | 11 |  | 8 |  |
| **Cirrhosis (images)** |  |  | NS |  | NS |
| Yes | 20 | 9 |  | 10 |  |
| No | 16 | 11 |  | 8 |  |
| **Child-Pugh class** |  |  | NS |  | NS |
| A | 31 | 19 |  | 18 |  |
| B7,8 | 5 | 1 |  | 0 |  |
| **Prior locoregional treatment** |  |  | NS |  | NS |
| Yes | 32 | 18 |  | 15 |  |
| No | 4 | 2 |  | 3 |  |
| **Prior systemic treatment** |  |  | NS |  | NS |
| Yes | 15 | 6 |  | 5 |  |
| No | 21 | 14 |  | 13 |  |
| **Prior antibiotics within 4 weeks** | |  | NS |  | NS |
| Yes | 4 | 0 |  | 1 |  |
| No | 32 | 20 |  | 17 |  |
| **Prior PPI within 4 weeks** | |  | NS |  | NS |
| Yes | 13 | 6 |  | 6 |  |
| No | 23 | 14 |  | 12 |  |
| **Alfa-fetoprotein levelc** |  |  | NS |  | NS |
| ≥ 400 ng/mL | 11 | 5 |  | 3 |  |
| < 400 ng/mL | 24 | 14 |  | 14 |  |
| **Response** |  |  | NS |  | NS |
| Yes | 10 | 7 |  | 6 |  |
| No | 26 | 13 |  | 12 |  |
| **Disease control** | |  | NS |  | * |
| Yes | 19 | 15 |  | 15 |  |
| No | 17 | 5 |  | 3 |  |

**a** *, *p*-value < 0.05; NS, *p-*value >0.05 (compared with baseline 16S DNA sequencing cohort)

b PPI: proton pump inhibitor

c One patient did not have baseline AFP level

**Table S2: Patient characteristics by baseline abundance of Bifidobacterium, Coprococcus and Acidaminococcus**

|  | **Bifidobacterium** | | | **Coprococcus** | | | **Acidaminococcus** | | |
| --- | --- | --- | --- | --- | --- | --- | --- | --- | --- |
|  | **High** | **Low** | ***p*-valuea** | **High** | **Low** | ***p*-valuea** | **High** | **Low** | ***p*-valuea** |
| **N=18** | **N=** | **N=19** | **N=17** | **N=18** | **N=26** |
| **Age (year-old)** | |  | NS |  |  | NS |  |  | NS |
| Average | 59.3 | 66 |  | 63.4 | 65.6 |  | 63.95 | 63.65 |  |
| Range | 23.1-75.9 | 53.1-86.6 | 23.1-79.0 | 42.9-86.6 | 23.1-86.6 | 49.3-73.2 |
| **Gender** |  |  | NS |  |  | * |  |  | NS |
| Male | 15 | 16 |  | 19 | 12 |  | 16 | 15 |  |
| Female | 3 | 2 |  | 0 | 5 |  | 2 | 3 |  |
| **Etiology** |  |  | NS |  |  | NS |  |  | NS |
| None | 1 | 2 |  | 2 | 1 |  | 1 | 2 |  |
| HBV | 12 | 9 |  | 11 | 10 |  | 13 | 8 |  |
| HCV | 2 | 4 |  | 2 | 4 |  | 1 | 5 |  |
| Alcohol | 0 | 1 |  | 1 | 0 |  | 0 | 1 |  |
| HBV+HCV | 1 | 1 |  | 1 | 0 |  | 1 | 1 |  |
| HBV+ Alcohol | 2 | 0 |  | 1 | 1 |  | 2 | 0 |  |
| HCV + Alcohol | 1 | 1 |  | 1 | 1 |  | 0 | 2 |  |
| **Treatment** |  |  | NS |  |  | NS |  |  | ** |
| Anti-PD-1/anti-PD-L1 | 11 | 16 |  | 12 | 15 |  | 10 | 17 |  |
| Anti-PD-1/anti-PD-L1 + targeted | 7 | 2 |  | 7 | 2 |  | 8 | 1 |  |
| **Portal vein invasion** |  |  | NS |  |  | NS |  |  | NS |
| Yes | 9 | 10 |  | 11 | 8 |  | 10 | 9 |  |
| No | 9 | 8 |  | 8 | 9 |  | 8 | 9 |  |
| **Metastasis** |  |  | NS |  |  | NS |  |  | NS |
| Yes | 6 | 10 |  | 7 | 11 |  | 11 | 7 |  |
| No | 10 | 8 |  | 12 | 6 |  | 7 | 11 |  |
| **Cirrhosis (images)** | |  | NS |  |  | NS |  |  | NS |
| Yes | 11 | 9 |  | 11 | 9 |  | 9 | 11 |  |
| No | 7 | 9 |  | 8 | 8 |  | 9 | 7 |  |
| **Child-Pugh class** | |  | NS |  |  | NS |  |  | NS |
| A | 17 | 14 |  | 17 | 14 |  | 16 | 15 |  |
| B7,8 | 1 | 4 |  | 2 | 3 |  | 2 | 3 |  |
| **Prior locoregional treatment** | | | NS |  |  | NS |  |  | NS |
| Yes | 16 | 16 |  | 17 | 15 |  | 16 | 16 |  |
| No | 2 | 2 |  | 2 | 2 |  | 2 | 2 |  |
| **Prior systemic treatment** | |  | NS |  |  | * |  |  | NS |
| Yes | 6 | 9 |  | 5 | 10 |  | 5 | 10 |  |
| No | 12 | 9 |  | 14 | 7 |  | 13 | 8 |  |
| **Prior antibiotics within 4 weeks** | |  | NS |  |  | * |  |  | * |
| Yes | 1 | 3 |  | 0 | 4 |  | 0 | 4 |  |
| No | 17 | 15 |  | 19 | 13 |  | 18 | 14 |  |
| **Prior PPI**b **within 4 weeks** | |  | NS |  |  | NS |  |  | NS |
| Yes | 7 | 6 |  | 7 | 6 |  | 9 | 4 |  |
| No | 11 | 12 |  | 12 | 11 |  | 9 | 14 |  |
| **Alpha-fetoprotein levelc** | |  | NS |  |  | NS |  |  | NS |
| ≥ 400 ng/mL | 6 | 5 |  | 6 | 5 |  | 7 | 4 |  |
| < 400 ng/mL | 11 | 13 | 13 | 12 | 11 | 14 |
| **Response** |  |  | NS |  |  | NS |  |  | NS |
| Yes | 7 | 3 |  | 6 | 4 |  | 6 | 4 |  |
| No | 11 | 15 |  | 13 | 13 |  | 12 | 14 |  |
| **Disease control** | |  | * |  |  | * |  |  | NS |
| Yes | 13 | 6 |  | 13 | 6 |  | 12 | 7 |  |
| No | 5 | 12 | 6 | 11 | 6 | 11 |

a*p*-value: *, < 0.05; **, < 0.01; NS, not statistically significant.

b PPI: proton pump inhibitor

c One patient missed baseline alpha-fetoprotein level.

**Figure S1. Heatmap of relative abundance of selected taxa.** Twenty-nine taxa showed statistically significant differences in abundance between responders and nonresponders or between disease control and nondisease control cases using MegagenomeSeq test46 Welch’s *t* test47, and LEfSe analysis48 (described in the methods). Their relative abundance in individual samples is shown. R, responders; NR, nonresponders; DC, disease control; NDC, nondisease control.

**Figure S2. Comparisons of relative abundance of select taxa between nonresponders and responders.** A. Baseline 16S rRNA sequencing cohort (N=36); B. Shotgun whole-genome sequencing subset (N=18). NR, nonresponders; R, responders.

**Figure S3. Comparisons of relative abundance of select taxa between patients with and those without disease control assessed by 16S rRNA sequencing.** NDC, nondisease control; DC, disease control.

**Figure S4. Comparisons of relative abundance of select taxa between patients with and those without disease control assessed by shotgun whole-genome sequencing.** NDC, nondisease control; DC, disease control.

**Figure S5. Beta diversity measured as weighted Unifrac distance by efficacy.** (A) Nonresponders (NR) vs. responders (R); (B) Nondisease control (NDC) vs. disease control (DC). 0W, before initiation of immunotherapy; 8W, 8 weeks after initiation of immunotherapy; *, *p* < 0.05; NS, nonsignificant.

**Figure S6. Relative abundance of top 10 phyla in the baseline gut microbiota of patients with HCC receiving ICI.** (A)Left, bar plots of relative abundance of top 10 phyla in the baseline gut microbiota of individual patients. Right, comparison of the relative abundance of the *Bacteroidetes* phylum between nonresponders (NR) and responders (R) is shown in the box plot. (B) Left, bar plots of relative abundance of the top 10 phyla in the baseline gut microbiota of individual patients. Right, comparison of the relative abundance of the *Bacteroidetes* phylum between nondisease control (NDC) and disease control (DC) groups is shown in the box plot. Box plots demonstrated minimum, first quartile, median, third quartile and maximum. NS, nonsignificant.
